# Supplementary material
Source: PubMed Central journal article supplement (PMC3256658)
Supplement: supp_194.2.261_FigS1_TableS1-S3.pdf [file supp_194.2.261_FigS1_TableS1-S3.pdf]

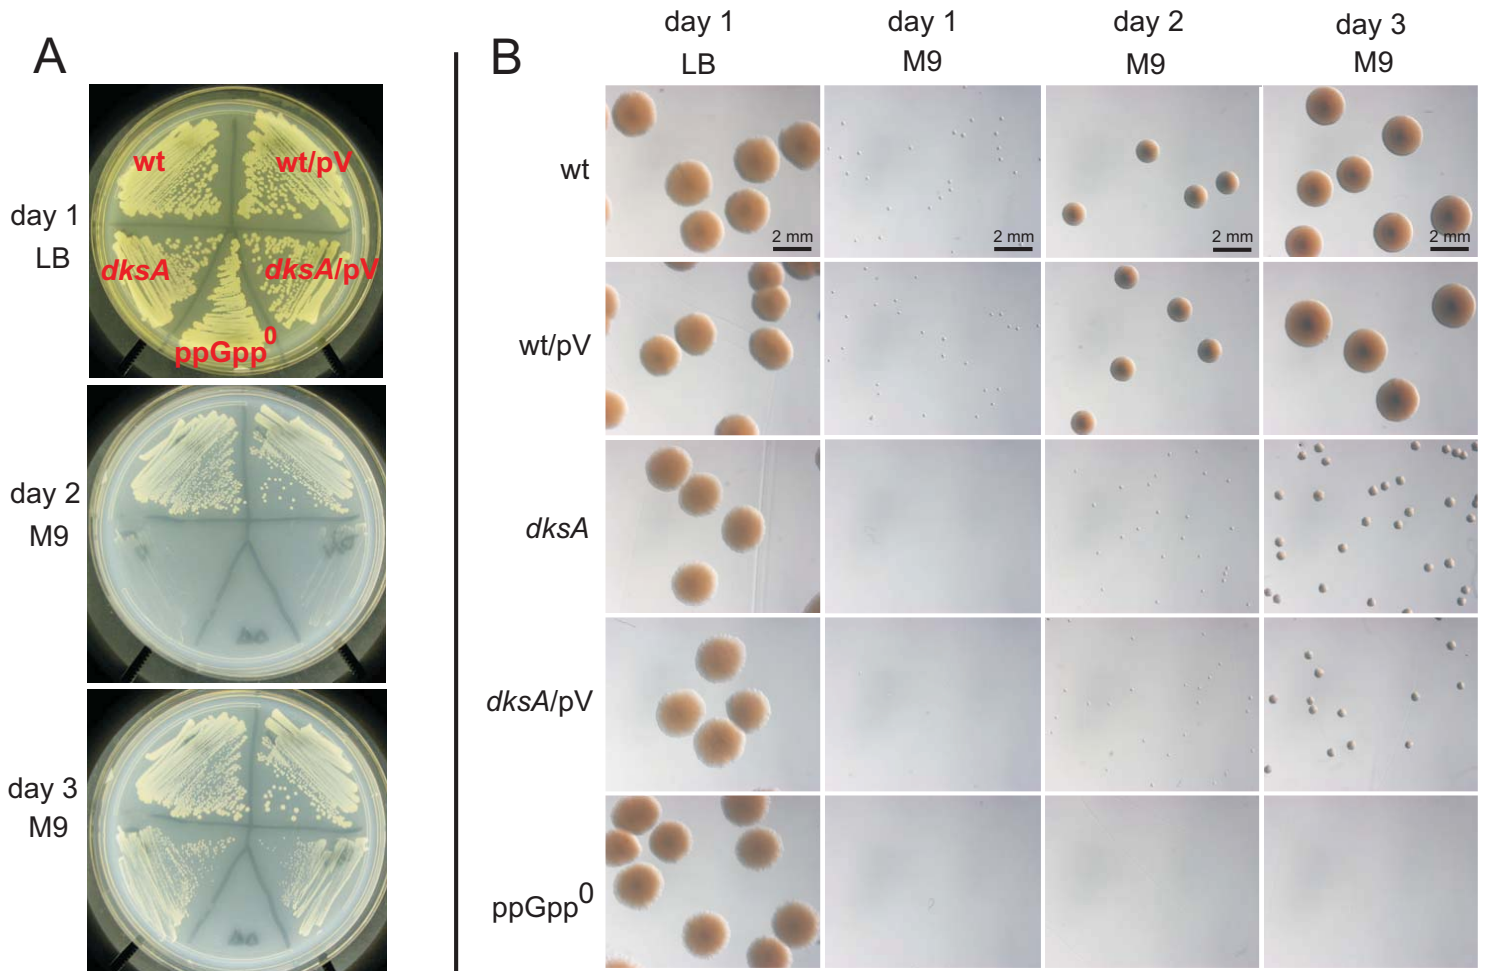

**Fig. S1. Growth of *wt* and *dksA* strains on LB and minimal plates in the presence or absence of the vector control. A.** The individual strains were streaked on LB or minimal plates; *ppGpp<sup>0</sup>* strain is included as a negative control. A Cannon PowerShot Pro1 camera was used. **B.** Images of individual colonies obtained by spreading cell culture dilutions on LB and minimal plates. A Leica MZ12 microscope with Jenoptik Progress C14 camera was used. Vector control (*pV*) is *pGB2*.

**Table S1. Strains**

|         |                                                       |                                               |
|---------|-------------------------------------------------------|-----------------------------------------------|
| CF1648  | MG1655                                                | (1)                                           |
| CF6301  | MG1655 but <i>relA251 rrnBP1':::lacZ ΔrelA25::kan</i> | (2)                                           |
| CF7968  | MG1655 but <i>rph+ ΔlacIZ</i>                         | (3)                                           |
| CF9239  | MG1655 but <i>ΔdksA::kan</i>                          | (3)                                           |
| CF9240  | MG1655 but <i>ΔdksA::tet</i>                          | (3)                                           |
| CF10237 | MG1655 but <i>ΔrelA256 ΔspoT212</i>                   | KK371 (4)                                     |
| CF11657 | MG1655 but <i>ΔgreA::cat</i>                          | (5)                                           |
| CF11663 | MG1655 but <i>ΔgreB::kan</i>                          | MG1655 x CLT255                               |
| CF11929 | CF6301 <i>ΔdksA::kan</i>                              | (5)                                           |
| CF11935 | CF6301 <i>ΔspoT207 ΔlacIZ rrnBP1::lacZ</i>            | (5)                                           |
| CF11938 | CF11935 <i>ΔdksA::tet</i>                             | (5)                                           |
| CF12257 | CF7968 but <i>rph+ ΔrelA256 ΔspoT212</i>              | (6)                                           |
| CF15615 | CF10237 but <i>ΔrelA256 ΔspoT212 ΔlacIZ</i>           | as CF12257 but for 10237                      |
| CF15617 | MG1655 but <i>ΔlacIZ</i>                              | as CF6301 but for MG1655                      |
|         |                                                       |                                               |
| CF12767 | CF7968 ( <i>λ PgreA::lacZ</i> )                       | Lysogen of CF7968, See Materials and Methods  |
| CF12775 | CF7968 ( <i>λ PgreA::lacZ greA::cat</i> )             | CF12767 x CF11657                             |
| CF12776 | CF7968 ( <i>λ PgreA::lacZ greB::kan</i> )             | CF12767 x CF11663                             |
| CF12777 | CF7968 ( <i>λ PgreA::lacZ dksA::kan</i> )             | CF12767 x CF9239                              |
| CF12773 | CF7968 ( <i>λ PgreB::lacZ</i> )                       | Lysogen of CF7968, See Materials and Methods  |
| CF12790 | CF7968 ( <i>λ PgreB<sub>B</sub>::lacZ greA::cat</i> ) | CF12790 x CF11657                             |
| CF12791 | CF7968 ( <i>λ PgreB::lacZ greB::kan</i> )             | CF12790 x CF11663                             |
| CF12792 | CF7968 ( <i>λ PgreB::lacZ dksA::kan</i> )             | CF12790 x CF9239                              |
| CF12790 | CF7968 ( <i>λ PdksA::lacZ</i> )                       | Lysogen of CF7968, See Materials and Methods  |
| CF12780 | CF7968 ( <i>λ PdksA::lacZ greA::cat</i> )             | CF12790 x CF11657                             |
| CF12781 | CF7968 ( <i>λ PdksA::lacZ greB::kan</i> )             | CF12790 x CF11663                             |
| CF12782 | CF7968 ( <i>λ PdksA::lacZ dksA::kan</i> )             | CF12790 x CF9239                              |
|         |                                                       |                                               |
| CF12602 | CF12257 ( <i>λ PgreA::lacZ</i> )                      | Lysogen of CF12257, See Materials and Methods |
| CF12719 | CF12257 ( <i>λ PgreA::lacZ greA::cat</i> )            | CF12602 x CF11657                             |
| CF12720 | CF12257 ( <i>λ PgreA::lacZ greB::kan</i> )            | CF12602 x CF11663                             |
| CF12721 | CF12257 ( <i>λ PgreA::lacZ dksA::kan</i> )            | CF12602 x CF9239                              |
| CF12412 | CF12257 ( <i>λ PgreB::lacZ</i> )                      | Lysogen of CF12257, See Materials and Methods |
| CF12743 | CF12257 ( <i>λ PgreB::lacZ greA::cat</i> )            | CF12412 x CF11657                             |
| CF12744 | CF12257 ( <i>λ PgreB::lacZ greB::kan</i> )            | CF12412 x CF11663                             |
| CF12745 | CF12257 ( <i>λ PgreB::lacZ dksA::kan</i> )            | CF12412 x CF9239                              |
| CF12604 | CF12257 ( <i>λ PdlsA::lacZ</i> )                      | Lysogen of CF12257, See Materials and Methods |
| CF12627 | CF12257 ( <i>λ PdksA::lacZ greA::cat</i> )            | CF12604 x CF116574                            |
| CF12628 | CF12257 ( <i>λ PdksA::lacZ greB::kan</i> )            | CF12604 x CF11663                             |
| CF12629 | CF12257 ( <i>λ PdksA::lacZ dksA::kan</i> )            | CF12604 x CF9239                              |
|         |                                                       |                                               |
| DV1618  | CF15617 ( <i>λ PgadA::lacZ</i> )                      | Lysogen of CF15617, See Materials and Methods |
| DV1640  | CF15617 ( <i>λ gadA::lacZ dksA::kan</i> )             | DV1618 x CF9239                               |
| DV1622  | CF15615 ( <i>λ PgadA::lacZ</i> )                      | Lysogen of CF15615, See Materials and Methods |
| DV1641  | CF15615 ( <i>λ PgadA::lacZ dksA::kan</i> )            | DV1622 x CF9239                               |
| DV1620  | CF15617 ( <i>λ PgadE::lacZ</i> )                      | Lysogen of CF15617, See Materials and Methods |
| DV1642  | CF15617 ( <i>λ PgadE::lacZ dksA::kan</i> )            | DV1620 x CF9239                               |
| DV1624  | CF15615 ( <i>λ PgadE::lacZ</i> )                      | Lysogen of CF15615, See Materials and Methods |
| DV1643  | CF15615 ( <i>λ PgadE::lacZ dksA::kan</i> )            | DV1624 x CF9239                               |
|         |                                                       |                                               |

|         |                                                                |                                         |
|---------|----------------------------------------------------------------|-----------------------------------------|
| CF16124 | CF15615 but $\Delta greA::kan$                                 | CF15515 x $\Delta greA::kan$ JW3148 (8) |
| CF16126 | CF15615 $\Delta greA$                                          | CF15615 x CF16124 (cured)               |
| CF16132 | CF15615 but $\Delta greB::kan$                                 | CF15515 x $\Delta greB::kan$ JW3679 (8) |
| CF16128 | CF15615 $\Delta greB$                                          | CF15615 x CF16132 (cured)               |
| CF16138 | CF15615 $\Delta dksA::kan$                                     | CF15615 x $\Delta dksA::kan$ JW0141 (8) |
| CF16151 | CF15615 $\Delta greA \Delta greB$                              | CF16126 x JW3679 (cured)                |
| CF16152 | CF15615 $\Delta greA \Delta dksA::kan$                         | This work                               |
| CF16180 | CF15615 $\Delta greB \Delta dksA::kan$                         | CF16132 x CF16138                       |
| CF16186 | CF15615 $\Delta greA \Delta greB \Delta dksA::tet$             | CF16151 x CF16138                       |
|         |                                                                |                                         |
| CF15971 | CF15617 but $greA::cat$                                        | CF15617 x CF11657                       |
| CF15977 | CF15617 but $greB::kan$                                        | CF15617 x CF11663                       |
| CF15989 | CF15617 but $dksA::tet$                                        | CF15617 x CF9240                        |
| CF16050 | CF15617 but $greA::cat greB::kan$                              | CF15971 x CF11663                       |
| CF16035 | CF11617 but $greA::cat dksA::tet$                              | CF15871 x CF9240                        |
| CF16041 | CF15617 but $greB::kan dksA::tet$                              | CF15977 x CF9240                        |
| CF16101 | CF15617 but $greA::cat greB::kan dksA::tet$                    | CF16050 x CF11657                       |
|         |                                                                |                                         |
| CF11762 | CF1693 but $rpoB114$ (S531F) $btuB::Tn10$                      | allele: (9)                             |
| CF11770 | CF1693 but $rpoB$ (G534C) $btuB::Tn10$                         | allele: (10)                            |
| CF11754 | CF1693 but $rpoB3443$ (L533P) $btuB::Tn10$ ( <i>rif-2</i> )    | allele: (9)                             |
| CF11774 | CF1693 but $rpoB$ (L571P) $btuB::Tn10$ ( <i>rif-1</i> )        | allele: unpublished Murphy & Cashel     |
| CF11758 | CF1693 but $rpoB3449$ (A532 $\Delta$ ) $btuB::Tn10$            | allele: (8)                             |
| CF11766 | CF1693 but $rpoB3370$ (T563P) $btuB::Tn10$                     | “ “                                     |
|         |                                                                |                                         |
| CF16377 | CF15615 but $rpoB$ (S531F) $btuB::Tn10$                        | CF15615 x CF11762                       |
| CF16383 | As CF16377 but $\Delta greA$                                   | CF16126 x “                             |
| CF16339 | As CF16377 but $\Delta greB$                                   | CF16132 x “                             |
| CF16395 | As CF16377 but $\Delta dksA::kan$                              | CF16138 x “                             |
| CF16401 | As CF16377 but $\Delta greA \Delta greB$                       | CF16151 x “                             |
| CF16419 | As CF16377 but $\Delta greA \Delta dksA::kan$                  | CF16152 x “                             |
| CF16409 | As CF16377 but $\Delta greB \Delta dksA::kan$                  | CF16180 x “                             |
| CF16427 | As CF16377 but $\Delta greA::cat \Delta greB \Delta dksA::kan$ | CF16186 x “                             |
|         |                                                                |                                         |
| CF16379 | CF15615 but $rpoB$ (G534C) $btuB::Tn10$                        | CF15615 x CF11770                       |
| CF16385 | As CF16379 but $\Delta greA$                                   | CF16126 x “                             |
| CF16391 | As CF16379 but $\Delta greB$                                   | CF16132 x “                             |
| CF16397 | As CF16379 but $\Delta dksA::kan$                              | CF16138 x “                             |
| CF16403 | As CF16379 but $\Delta greA \Delta greB$                       | CF16151 x “                             |
| CF16421 | As CF16379 but $\Delta greA \Delta dksA::kan$                  | CF16152 x “                             |
| CF16413 | As CF16379 but $\Delta greB \Delta dksA::kan$                  | CF16180 x “                             |
| CF16431 | As CF16379 but $\Delta greA::cat \Delta greB \Delta dksA::kan$ | CF16186 x “                             |
|         |                                                                |                                         |
| CF16375 | CF15615 but $rpoB$ (L533P) $btuB::Tn10$                        | CF15615 x CF11754                       |
| CF16381 | As CF16375 but $\Delta greA$                                   | CF16126 x “                             |
| CF16387 | As CF16375 but $\Delta greB$                                   | CF16132 x “                             |
| CF16393 | As CF16375 but $\Delta dksA::kan$                              | CF16138 x “                             |
| CF16399 | As CF16375 but $\Delta greA \Delta greB$                       | CF16151 x “                             |
| CF16417 | As CF16375 but $\Delta greA \Delta dksA::kan$                  | CF16152 x “                             |
| CF16405 | As CF16375 but $\Delta greB \Delta dksA::kan$                  | CF16180 x “                             |
| CF16423 | As CF16375 but $\Delta greA::cat \Delta greB \Delta dksA::kan$ | CF16186 x “                             |
|         |                                                                |                                         |
| CF16380 | CF15615 but $rpoB$ (L571P) $btuB::Tn10$                        | CF15615 x CF11774                       |
| CF16386 | As CF16380 but $\Delta greA$                                   | CF16126 x “                             |
| CF16392 | As CF16380 but $\Delta greB$                                   | CF16132 x “                             |
| CF16398 | As CF16380 but $\Delta dksA::kan$                              | CF16138 x “                             |
| CF16404 | As CF16380 but $\Delta greA \Delta greB$                       | CF16151 x “                             |

|         |                                                                |                   |
|---------|----------------------------------------------------------------|-------------------|
| CF16415 | As CF16380 but $\Delta greA \Delta dksA::kan$                  | CF16152x “        |
| CF16422 | As CF16380 but $\Delta greB \Delta dksA::kan$                  | CF16180 x “       |
| CF16433 | As CF16380 but $\Delta greA::cat \Delta greB \Delta dksA::kan$ | CF16186 x “       |
|         |                                                                |                   |
| CF16376 | CF15615 but <i>rpoB</i> (A532 $\Delta$ ) <i>btuB::Tn10</i>     | CF15615 x CF11758 |
| CF16382 | As CF16376 but $\Delta greA$                                   | CF16126 x “       |
| CF16388 | As CF16376 but $\Delta greB$                                   | CF16132 x “       |
| CF16394 | As CF16376 but $\Delta dksA::kan$                              | CF16138 x “       |
| CF16400 | As CF16376 but $\Delta greA \Delta greB$                       | CF16151 x “       |
| CF16418 | As CF16376 but $\Delta greA \Delta dksA::kan$                  | CF16152 x “       |
| CF16407 | As CF16376 but $\Delta greB \Delta dksA::kan$                  | CF16180 x “       |
| CF16425 | As CF16376 but $\Delta greA::cat \Delta greB \Delta dksA::kan$ | CF16186 x “       |
|         |                                                                |                   |
| CF16378 | CF15615 but <i>rpoB</i> (T563P) <i>btuB::Tn10</i>              | CF15615 x CF11766 |
| CF16384 | As CF163768 but $\Delta greA$                                  | CF16126 x “       |
| CF16390 | As CF16378 but $\Delta greB$                                   | CF16132 x “       |
| CF16396 | As CF16378 but $\Delta dksA::kan$                              | CF16138 x “       |
| CF16402 | As CF16378 but $\Delta greA \Delta greB$                       | CF16151 x “       |
| CF16411 | As CF16378 but $\Delta greA \Delta dksA::kan$                  | CF16152 x “       |
| CF16420 | As CF16378 but $\Delta greB \Delta dksA::kan$                  | CF16180 x “       |
| CF16429 | As CF16378 but $\Delta greA::cat \Delta greB \Delta dksA::kan$ | CF16186 x “       |

references.

1. Xiao H, Kalman M, Ikehara K, Zemel S, Glaser G et al. (1991) Residual guanosine 3',5'-bispyrophosphate synthetic activity of *relA* null mutants can be eliminated by *spoT* null mutations. *J Biol Chem.* 266:5980-5990.
2. Vinella D, Cashel M, D'Ari R (2000) Selected Amplification of the cell division genes *ftsQ-ftsA-ftsZ* in *Escherichia coli*. *Genetics.* 156:1483-1492.
3. Brown L, Gentry D, Elliott T, Cashel M (2002) DksA affects ppGpp induction of RpoS at a translational level. *J Bacteriol* 184: 4455-4465.
4. Jishage M, Kvint K, Shingler V, Nyström T. (2002) Regulation of sigma factor competition by the alarmone ppGpp. *Genes Dev.* 16: 1260-1270.
5. Potrykus K, Vinella D, Murphy H, Szalewska-Palasz A, D'Ari R et al. (2006) Antagonistic regulation of *Escherichia coli* ribosomal RNA *rrnB* P1 promoter activity by GreA and DksA. *J Biol Chem.* 281:15238-15248.
6. Harinarayanan R, Murphy H, Cashel M (2008) Synthetic growth phenotypes of *Escherichia coli* lacking ppGpp and transketolase A (*tktA*) are due to ppGpp-mediated transcriptional regulation of *tktB*. *Mol. Microbiol.* 69: 882-899.
7. Baba T, Ara T, Hasegawa M, Takai Y, Okumura Y et al. (2006) Construction of *Escherichia coli* K-12 in-frame, single-gene knockout mutants: the Keio collection. *Mol Syst Biol* 2: 2006 0008 10.1038/msb4100050.
8. Jin DJ, Gross CA (1988) Mapping and sequencing of mutations in the *Escherichia coli rpoB* gene that lead to rifampicin resistance. *J Mol Biol.* 202: 45-58.
9. Murphy H, Cashel M (2003) Isolation of RNA polymerase suppressors of a (p)ppGpp deficiency. *Methods Enzymol* 371: 596-601.

**Table S2.** Primers used for *lacZ* fusion construction and *greA* mutagenesis.

| PRIMERS                        | SEQUENCE (5' TO 3')                          |
|--------------------------------|----------------------------------------------|
| <b>TRANSCRIPTIONAL FUSIONS</b> |                                              |
| GREAUP (-250)*                 | GGCAGAATTCATAATCTCGCGCTAACCAACCTGGAATCGA     |
| GREADO (-13)                   | CACAGGATCCTGAATATTCCTGATAGGGCAAGTCTTCACCCACC |
| GREBUP (239)                   | GGCAGAATTCGTTCTCTTGCATTGTTTGTACTCCCAAAGG     |
| GREBDO (-18)                   | CAGAGGATCCTGTTTGATAATGCGCACATTGGGTATAACG     |
| DKSAUP (-256)                  | GGCAGAATTCGGTAGAAATTCTGGCTTACAAAGCGGAAA      |
| DKSADO (-16)                   | CACAGGATCCTTAACACGCACTATCGATCCCCATGTTTCG     |
| GADAUP (-313)                  | AAAGAATTCAGGTAGGCAAAGAGCTGCC                 |
| GADADO (-1)                    | AAAGGATCCTTCGAACTCCTTAAATTTATTG              |
| GAD EUP (-806)                 | AAAGAATTCAAGCAGCAATAATTACCCCG                |
| GAD EDO (-1)                   | AAAGGATCCAACCTTGCTCCTTAGCCGTTATC             |
| <b>GRE A MUTAGENESIS</b>       |                                              |
| HMPR277                        |                                              |
| FORWARD D41A + E44Y            | GCGCGTGAGCATGGCGCCCTGAAATATAACGCCGAATACCAC   |
| HMPR278                        |                                              |
| REVERSE D41A + E44A            | GTGGTATTCGGCGTTATATTTTCAGGGCGCCATGCTCACGCGC  |

\* numbers in parenthesis indicate the extent of the fusion relative to translational start site

**Table S3. Effects of GreA and GreB on ppGpp<sup>0</sup> and ppGpp<sup>0</sup> *dksA* strains.**  
(d- = *dksA*-; pv= vector control (pGB2); pA = pGreA; pB= pGreB)

**A. inhibited in ppGpp<sup>0</sup>*dksA*-, unaffected by GreA or GreB**

| pv/ d- pv                 | pv/ d- pv        | pv/ d- pv                 |
|---------------------------|------------------|---------------------------|
| 90.40 <i>dksA</i>         | 3.08 <i>sdhD</i> | 2.68 <i>yncE</i>          |
| 4.78 <i>yadB</i>          | 3.07 <i>ilvN</i> | 2.68 <i>pheL</i>          |
| 3.72 <i>glnH</i>          | 3.07 <i>ydjN</i> | 2.65 <i>aroF</i>          |
| 3.51 <i>exbB</i>          | 3.03 <i>fepA</i> | 2.64 <i>artP</i>          |
| 3.46 <i>artQ</i>          | 2.98 <i>sdhA</i> | 2.56 <i>proW</i>          |
| 3.46 <i>gltS</i>          | 2.90 <i>mglB</i> | 2.54 <i>b0725</i>         |
| 3.33 IG_2238369_2238647-r | 2.82 <i>artM</i> | 2.53 <i>sdhC</i>          |
| 3.32 IG_761963_762236-r   | 2.70 <i>guaB</i> | 2.52 IG_3530078_3530455-f |
| 3.25 IG_1298469_1299205-f | 2.70 <i>manX</i> |                           |

**B. activated in ppGpp<sup>0</sup>*dksA*-, unaffected by GreA or GreB**

| pv/ d- pv                 | pv/ d- pv                 | pv/ d- pv                 |
|---------------------------|---------------------------|---------------------------|
| 0.06 <i>fimC</i>          | 0.32 <i>yciT</i>          | 0.37 <i>purH</i>          |
| 0.07 <i>fimA</i>          | 0.33 <i>beeE'</i>         | 0.38 <i>purD</i>          |
| 0.12 <i>fimG</i>          | 0.33 <i>metA</i>          | 0.38 <i>yfbT</i>          |
| 0.15 <i>ydfO</i>          | 0.33 <i>purA</i>          | 0.38 <i>sprT</i>          |
| 0.16 <i>fimD</i>          | 0.33 <i>yihI</i>          | 0.38 <i>sibD</i>          |
| 0.19 <i>fimF</i>          | 0.33 <i>aceB</i>          | 0.38 <i>yi81</i>          |
| 0.19 <i>aroA</i>          | 0.34 <i>psiA</i>          | 0.38 <i>jayE'</i>         |
| 0.22 <i>fimH</i>          | 0.34 <i>ybjP</i>          | 0.38 <i>ldhA</i>          |
| 0.25 <i>pheP</i>          | 0.34 <i>ydil</i>          | 0.38 IG_2468483_2468780-r |
| 0.27 <i>pgaD</i>          | 0.34 <i>ycaK</i>          | 0.38 <i>msrA</i>          |
| 0.27 <i>ycgN</i>          | 0.34 <i>arnB</i>          | 0.38 <i>mdtI</i>          |
| 0.27 <i>rstB</i>          | 0.34 <i>yhhJ</i>          | 0.39 <i>treB</i>          |
| 0.27 <i>yceJ</i>          | 0.35 <i>ycaD</i>          | 0.39 <i>basR</i>          |
| 0.27 IG_804988_805220-r   | 0.35 <i>ybhC</i>          | 0.39 <i>yifN'</i>         |
| 0.27 <i>yfjV'</i>         | 0.35 <i>ybcW</i>          | 0.39 <i>alkB</i>          |
| 0.28 <i>ybhE</i>          | 0.35 IG_2267588_2267998-f | 0.39 <i>yedF</i>          |
| 0.28 IG_2494586_2495076-f | 0.36 IG_1671526_1671936-r | 0.39 <i>mdtJ</i>          |
| 0.28 <i>mokB</i>          | 0.36 <i>dcuA</i>          | 0.39 <i>kup</i>           |
| 0.29 <i>yegD</i>          | 0.36 <i>yciK</i>          | 0.39 <i>Int</i>           |
| 0.29 IS183_b4452          | 0.36 <i>yicH</i>          | 0.39 <i>insZ'</i>         |
| 0.29 <i>ilvH</i>          | 0.36 <i>serA</i>          | 0.39 <i>cysQ</i>          |
| 0.30 <i>yeeA</i>          | 0.36 <i>ryjA</i>          | 0.40 <i>yifE</i>          |
| 0.30 <i>kdpB</i>          | 0.36 <i>ygjR</i>          | 0.40 <i>ycel</i>          |
| 0.30 <i>yjbE</i>          | 0.37 <i>adhE</i>          | 0.40 <i>yfaE</i>          |
| 0.31 <i>leuB</i>          | 0.37 <i>xthA</i>          | 0.40 <i>trmL</i>          |
| 0.31 <i>rhtB</i>          | 0.37 IG_668152_668518-r   | 0.40 <i>cbrC</i>          |
| 0.32 <i>gadW</i>          | 0.37 IG_986206_986807-f   |                           |
| 0.32 <i>yfiE</i>          | 0.37 <i>yzgL</i>          |                           |
| 0.32 IG_953690_954094-r   | 0.37 <i>cydA</i>          |                           |

C. activated in ppGpp<sup>0</sup> *dksA*-, but GreA activates even more

| pv/ d- pv | d-pv/d-pA |      |
|-----------|-----------|------|
| 0.12      | 0.06      | hdeB |
| 0.15      | 0.07      | ybaS |
| 0.29      | 0.07      | hdeD |
| 0.16      | 0.07      | hdeA |
| 0.40      | 0.17      | rpsV |
| 0.06      | 0.18      | slp  |
| 0.31      | 0.22      | rmf  |
| 0.26      | 0.40      | aceK |

D. Inhibited in ppGpp<sup>0</sup> *dksA*-, but GreA inhibits even more

| pv/ d- pv | d-pv/d-pA |      |
|-----------|-----------|------|
| 2.72      | 6.77      | mgtA |

E. GreA and/or GreB inhibit in ppGpp<sup>0</sup> *dksA*-

| d-pv/d-pA | d-pv/d-pB |                      | d-pv/d-pA | d-pv/d-pB |                      |
|-----------|-----------|----------------------|-----------|-----------|----------------------|
| 8.21      | 4.16      | emrD                 | 2.90      | -         | ycjF                 |
| 7.34      | 4.46      | deaD                 | 2.89      | -         | IG_296321_296604-f   |
| 6.35      | 3.44      | IG_1306670_1307039-r | 2.89      | -         | IG_262171_262551-f   |
| 5.56      | -         | IG_1308294_1308592-r | 2.87      | -         | IG_3636772_3637014-f |
| 5.38      | -         | rarD                 | 2.86      | -         | menA                 |
| 5.06      | -         | ecnA                 | 2.86      | -         | yeiE                 |
| 4.33      | 2.84      | hslV                 | 2.85      | -         | yhdT                 |
| 4.24      | 3.19      | rdlA                 | 2.83      | -         | IG_1903284_1903657-f |
| 4.07      | -         | purP                 | 2.83      | -         | dnaJ                 |
| 4.02      | 2.82      | hslU                 | 2.82      | -         | nplI                 |
| 4.01      | -         | ygeQ'                | 2.80      | -         | tdh                  |
| 4.00      | -         | recX                 | 2.79      | -         | IG_643191_643419-r   |
| 3.99      | -         | yhbE                 | 2.77      | -         | ytfL                 |
| 3.97      | 3.09      | hspQ                 | 2.76      | -         | yihA                 |
| 3.79      | -         | puuC                 | 2.76      | -         | rlmB                 |
| 3.75      | -         | yicG                 | 2.75      | -         | dnaT                 |
| 3.70      | -         | IG_3326342_3326603-r | 2.74      | -         | rhIE                 |
| 3.67      | -         | IG_1269147_1269460-f | 2.74      | -         | ycgF                 |
| 3.67      | -         | IG_1269684_1269971-r | 2.72      | -         | rpIS                 |
| 3.63      | -         | IG_1927732_1928057-r | 2.72      | -         | IG_3402255_3403072-f |
| 3.60      | -         | IG_1360493_1360766-f | 2.71      | 2.62      | ucpA                 |
| 3.59      | -         | yihG                 | 2.71      | -         | erpA                 |
| 3.50      | 2.83      | yfcZ                 | 2.71      | -         | selU                 |
| 3.47      | -         | IG_3645282_3646157-f | 2.67      | -         | umuC                 |
| 3.39      | -         | IG_259325_259611-f   | 2.67      | -         | pitA                 |



|      |      |                      |      |      |                      |
|------|------|----------------------|------|------|----------------------|
| 3.36 | -    | IG_831460_831690-f   | 2.66 | -    | htpX                 |
| 3.33 | -    | tpr                  | 2.65 | -    | yebE                 |
| 3.32 | -    | bioA                 | 2.65 | -    | cgtA                 |
| 3.24 | -    | sibC                 | 2.63 | 3.10 | hokD                 |
| 3.22 | -    | cyaR                 | 2.63 | -    | yhjJ                 |
| 3.18 | -    | IG_2925695_2926250-f | 2.62 | -    | sbcD                 |
| 3.16 | -    | IG_2660152_2660602-r | 2.62 | -    | slmZ                 |
| 3.16 | -    | yiiX                 | 2.62 | -    | ade                  |
| 3.15 | -    | rnk                  | 2.61 | 2.58 | glmZ                 |
| 3.15 | -    | IG_2438141_2438404-r | 2.61 | 2.98 | yhhQ                 |
| 3.14 | -    | IG_2689361_2689675-r | 2.59 | -    | emrE                 |
| 3.14 | -    | hslR                 | 2.58 | 2.25 | ryfA                 |
| 3.07 | -    | ndK                  | 2.58 | -    | ansB                 |
| 3.07 | -    | gcd                  | 2.57 | -    | ydiY                 |
| 3.06 | -    | uvrD                 | 2.56 | -    | ychE                 |
| 3.05 | 2.75 | recN                 | 2.55 | 2.62 | IG_856779_857018-f   |
| 3.04 | -    | sdaC                 | 2.54 | -    | lldP                 |
| 3.04 | -    | IG_631223_631611-r   | 2.54 | -    | prfC                 |
| 3.03 | 2.52 | IG_2815526_2815805-r | 2.53 | -    | yahM                 |
| 3.02 | 2.83 | zntA                 | 2.51 | -    | hscA                 |
| 3.02 | 2.54 | yfiP                 | 2.51 | -    | mnmG                 |
| 3.02 | 2.72 | gfcA                 | 2.51 | -    | lon                  |
| 3.01 | -    | IG_1120179_1120464-r | -    | 3.16 | uspG                 |
| 3.00 | -    | IG_3679571_3679790-r | -    | 2.75 | glmY                 |
| 3.00 | -    | sdaB                 | -    | 2.84 | degP                 |
| 2.99 | 2.57 | nusB                 | -    | 2.73 | bssS                 |
| 2.97 | 3.54 | mutL                 | -    | 2.93 | 4.5SRNA              |
| 2.92 | 2.76 | atpC                 | -    | 2.68 | IG_1019277_1019632-r |
| 2.91 | -    | IG_1994856_1995084-f | -    | 2.66 | nhaA                 |
| 2.91 | -    | yhgN                 | -    | 2.60 | clpB                 |
| 2.90 | -    | htpG                 | -    | 2.57 | fabA                 |
| 2.90 | -    | IG_3575186_3575415-r | -    | 2.51 | recA                 |

#### F. GreA and/or GreB activate in ppGpp<sup>0</sup> *dksA*-

| d-pv/d-pA | d-pv/d-pB |                      | d-pv/d-pA | d-pv/d-pB |                    |
|-----------|-----------|----------------------|-----------|-----------|--------------------|
| 0.01      | 0.23      | gadB                 | 0.27      | -         | cfa                |
| 0.01      | 0.35      | gadA                 | 0.27      | 0.28      | gsiA               |
| 0.02      | -         | gadC                 | 0.27      | -         | sufC               |
| 0.02      | -         | fliA                 | 0.28      | -         | aroG               |
| 0.03      | 0.31      | gadE                 | 0.28      | -         | blc                |
| 0.04      | 0.17      | flgC                 | 0.28      | -         | IG_302830_303076-f |
| 0.04      | 0.14      | flgE                 | 0.28      | -         | fic                |
| 0.04      | -         | IG_3656524_3656861-f | 0.28      | 0.37      | dld                |
| 0.04      | 0.16      | flgB                 | 0.28      | -         | sufB               |
| 0.05      | 0.19      | flgD                 | 0.28      | 0.28      | pqqL               |
| 0.05      | 0.17      | flgF                 | 0.29      | 0.36      | hisH               |



|      |             |                      |      |             |                      |
|------|-------------|----------------------|------|-------------|----------------------|
| 0.06 | <b>0.27</b> | ycaC                 | 0.29 | -           | sufA                 |
| 0.07 | <b>0.31</b> | fbaB                 | 0.29 | <b>0.34</b> | IG_779613_779776-r   |
| 0.07 | <b>0.28</b> | katE                 | 0.29 | -           | yjdJ                 |
| 0.08 | -           | yhiM                 | 0.29 | -           | IG_1739147_1739436-f |
| 0.08 | -           | IG_3655198_3655995-f | 0.30 | -           | ygaU                 |
| 0.08 | -           | ybaT                 | 0.30 | -           | ydiJ                 |
| 0.08 | -           | otsB                 | 0.30 | -           | yjjU                 |
| 0.08 | <b>0.33</b> | yegP                 | 0.30 | -           | ivy                  |
| 0.08 | <b>0.33</b> | amyA                 | 0.30 | -           | ybeM'                |
| 0.08 | -           | fliE                 | 0.30 | -           | yehY                 |
| 0.08 | -           | yhiD                 | 0.31 | -           | IG_1860454_1860794-f |
| 0.09 | -           | fliL                 | 0.31 | <b>0.36</b> | ompF                 |
| 0.09 | -           | mdtE                 | 0.31 | -           | gapC'                |
| 0.10 | -           | yiaG                 | 0.31 | <b>0.30</b> | gsiD                 |
| 0.10 | -           | fliK                 | 0.31 | -           | fhuF                 |
| 0.10 | -           | yfcG                 | 0.31 | -           | IG_338968_339388-r   |
| 0.10 | -           | flgH                 | 0.31 | -           | asd                  |
| 0.11 | -           | ygaM                 | 0.31 | -           | yqjD                 |
| 0.11 | -           | IG_1639579_1639878-r | 0.31 | -           | yncB                 |
| 0.11 | -           | msyB                 | 0.31 | -           | IG_1066932_1067140-r |
| 0.11 | -           | fliZ                 | 0.31 | -           | ecnB                 |
| 0.12 | -           | otsA                 | 0.32 | -           | IG_836660_836887-f   |
| 0.12 | -           | flgL                 | 0.32 | -           | fiil                 |
| 0.12 | <b>0.32</b> | ybgA                 | 0.32 | <b>0.39</b> | nadE                 |
| 0.12 | -           | yceK                 | 0.32 | -           | efeO                 |
| 0.12 | -           | yeaG                 | 0.32 | -           | ydcH                 |
| 0.12 | -           | ycgB                 | 0.32 | -           | IG_1488390_1488889-r |
| 0.13 | <b>0.38</b> | flgG                 | 0.32 | -           | IG_2792037_2792273-f |
| 0.13 | -           | poxB                 | 0.32 | -           | yjjV                 |
| 0.13 | <b>0.38</b> | talA                 | 0.32 | -           | flxA                 |
| 0.13 | -           | mdtF                 | 0.33 | -           | hisB                 |
| 0.13 | -           | appC                 | 0.33 | -           | chaC                 |
| 0.14 | -           | elaB                 | 0.33 | -           | IG_3119296_3119649-r |
| 0.14 | -           | aidB                 | 0.33 | -           | yphA                 |
| 0.14 | -           | dctR                 | 0.33 | <b>0.35</b> | dppA                 |
| 0.15 | -           | ydaM                 | 0.33 | -           | IG_2769637_2769860-r |
| 0.15 | -           | IG_3663441_3663809-r | 0.33 | <b>0.38</b> | potG                 |
| 0.15 | -           | ygdl                 | 0.33 | -           | IG_921814_922135-r   |
| 0.16 | -           | appB                 | 0.34 | -           | uspB                 |
| 0.16 | -           | yhcO                 | 0.34 | -           | ybeM'                |
| 0.16 | -           | flgA                 | 0.34 | -           | yniA                 |
| 0.16 | -           | yahK                 | 0.34 | -           | ygiW                 |
| 0.16 | <b>0.38</b> | ybhP                 | 0.34 | -           | tsr                  |
| 0.16 | -           | bfr                  | 0.34 | -           | yjgH                 |
| 0.16 | -           | fliG                 | 0.34 | -           | yjdl                 |
| 0.17 | -           | tam                  | 0.34 | -           | IG_3182483_3182795-r |
| 0.17 | -           | gapC'                | 0.34 | -           | efeU'                |
| 0.17 | -           | fliC                 | 0.35 | -           | ypjF                 |
| 0.17 | -           | flgJ                 | 0.35 | -           | efeB                 |
| 0.17 | <b>0.24</b> | rfaL                 | 0.35 | -           | cueR                 |

|      |             |                      |      |             |                      |
|------|-------------|----------------------|------|-------------|----------------------|
| 0.17 | -           | IG_1864497_1864931-f | 0.35 | -           | IG_1239173_1239557-r |
| 0.18 | <b>0.22</b> | yfjW                 | 0.35 | -           | bfd                  |
| 0.18 | -           | osmF                 | 0.35 | -           | fliS                 |
| 0.18 | <b>0.18</b> | gtrS                 | 0.35 | -           | mug                  |
| 0.18 | -           | yciF                 | 0.35 | -           | evgS                 |
| 0.19 | -           | yodD                 | 0.36 | -           | mtfA                 |
| 0.19 | <b>0.40</b> | chaB                 | 0.36 | -           | IG_3662249_3662493-r |
| 0.19 | -           | osmY                 | 0.36 | -           | potF                 |
| 0.19 | -           | fliM                 | 0.36 | -           | ynhG                 |
| 0.19 | -           | wrbA                 | 0.36 | -           | IG_3663441_3663809-f |
| 0.20 | -           | IG_3571136_3571407-f | 0.36 | -           | ygaC                 |
| 0.20 | -           | yehE                 | 0.37 | -           | yneE                 |
| 0.20 | -           | osmE                 | 0.37 | -           | yjgF                 |
| 0.20 | -           | yncA                 | 0.37 | -           | holE                 |
| 0.21 | -           | ybil                 | 0.37 | -           | tyrB                 |
| 0.21 | -           | cheA                 | 0.37 | -           | flgN                 |
| 0.21 | <b>0.24</b> | gatC                 | 0.37 | -           | tatE                 |
| 0.21 | -           | gdhA                 | 0.37 | -           | pptA                 |
| 0.21 | -           | yccJ                 | 0.37 | -           | ybiX                 |
| 0.21 | -           | yfcF                 | 0.37 | -           | ydcZ                 |
| 0.22 | -           | tar                  | 0.38 | -           | sufD                 |
| 0.22 | -           | yghU                 | 0.38 | -           | ghrA                 |
| 0.22 | -           | gadX                 | 0.38 | -           | ilvL                 |
| 0.22 | -           | yhfG                 | 0.38 | -           | ygiV                 |
| 0.22 | -           | fliO                 | 0.38 | -           | rssB                 |
| 0.22 | -           | cspB                 | 0.38 | -           | glcG                 |
| 0.22 | -           | yddM                 | 0.38 | <b>0.18</b> | yliF                 |
| 0.22 | -           | yebV                 | 0.38 | -           | fhuC                 |
| 0.22 | <b>0.38</b> | yeiG                 | 0.38 | -           | dcp                  |
| 0.23 | <b>0.28</b> | hisC                 | 0.38 | -           | IG_2378439_2378741-r |
| 0.23 | -           | ykgC                 | 0.38 | -           | phrB                 |
| 0.23 | -           | psiF                 | 0.38 | -           | yhjY                 |
| 0.23 | -           | tktB                 | 0.39 | -           | hisQ                 |
| 0.23 | -           | IG_1515027_1515337-r | 0.39 | -           | shiA                 |
| 0.23 | -           | flgM                 | 0.39 | -           | sufS                 |
| 0.23 | <b>0.31</b> | hisG                 | 0.39 | -           | IG_3154533_3154753-f |
| 0.23 | <b>0.23</b> | gsiC                 | 0.39 | -           | grxB                 |
| 0.23 | <b>0.26</b> | gsiB                 | 0.39 | <b>0.36</b> | zinT                 |
| 0.24 | <b>0.30</b> | ybiC                 | 0.39 | -           | IG_1050399_1050683-f |
| 0.24 | -           | cheW                 | 0.39 | -           | yagU                 |
| 0.24 | -           | yghA                 | 0.39 | -           | ybgl                 |
| 0.24 | -           | ybaY                 | 0.39 | -           | aroD                 |
| 0.24 | -           | yeaQ                 | 0.40 | -           | IG_3571136_3571407-r |
| 0.25 | <b>0.29</b> | gatB                 | 0.40 | -           | fruL                 |
| 0.25 | -           | ydiZ                 | 0.40 | -           | inaA                 |
| 0.25 | -           | IG_1565165_1565527-r | -    | <b>0.22</b> | IG_2411153_2411489-f |
| 0.25 | -           | ybeL                 | -    | <b>0.28</b> | tauA                 |
| 0.25 | -           | yegS                 | -    | <b>0.29</b> | yihL                 |
| 0.25 | -           | dkgA                 | -    | <b>0.29</b> | IG_3358252_3358810-f |
| 0.25 | <b>0.24</b> | iaaA                 | -    | <b>0.29</b> | ackA                 |

|      |      |                      |   |      |                      |
|------|------|----------------------|---|------|----------------------|
| 0.26 | -    | caiF                 | - | 0.30 | yecS                 |
| 0.26 | 0.30 | hisF                 | - | 0.34 | appY                 |
| 0.26 | -    | cheY                 | - | 0.34 | yjhC                 |
| 0.26 | 0.37 | hisD                 | - | 0.36 | gltF                 |
| 0.26 | -    | yodC                 | - | 0.37 | IG_1796967_1797249-r |
| 0.26 | -    | entA                 | - | 0.37 | murQ                 |
| 0.27 | -    | marR                 | - | 0.38 | pta                  |
| 0.27 | -    | nhoA                 | - | 0.38 | sppA                 |
| 0.27 | -    | yqjC                 | - | 0.39 | yecC                 |
| 0.27 | -    | ycaP                 | - | 0.39 | IG_3043922_3044187-r |
| 0.27 | -    | entE                 | - | 0.40 | potH                 |
| 0.27 | -    | entH                 | - | 0.40 | IG_2097636_2097883-r |
| 0.27 | -    | IG_1388683_1388956-r |   |      |                      |

**G. inhibited in ppGpp<sup>0</sup> *dkSA*<sup>-</sup>, but GreA and/or GreB prevents that**

| pv/ d- pv | d-pv/d-pA | d-pv/d-pB |                    |
|-----------|-----------|-----------|--------------------|
| 19.73     | 0.07      | 0.04      | cysH               |
| 15.01     | 0.09      | 0.05      | cysI               |
| 14.67     | 0.21      | 0.14      | yeeE               |
| 12.72     | 0.06      | 0.04      | cysD               |
| 12.18     | 0.22      | 0.18      | yeeD               |
| 11.79     | 0.10      | 0.07      | cysJ               |
| 10.76     | 0.08      | 0.05      | cysC               |
| 10.54     | 0.08      | 0.06      | cysN               |
| 9.95      | 0.20      | 0.39      | nac                |
| 9.88      | 0.13      | 0.20      | argF               |
| 9.00      | 0.15      | 0.24      | argA               |
| 8.98      | 0.22      | -         | glnK               |
| 8.94      | 0.13      | 0.10      | cysW               |
| 8.91      | 0.10      | 0.19      | argI               |
| 8.74      | 0.13      | 0.28      | ppsA               |
| 8.63      | 0.11      | 0.09      | cysA               |
| 8.60      | 0.14      | 0.12      | cysP               |
| 8.31      | 0.20      | 0.28      | argH               |
| 8.03      | 0.18      | 0.22      | argC               |
| 7.72      | 0.34      | 0.11      | sbp                |
| 7.56      | 0.08      | 0.16      | nadA               |
| 7.53      | 0.16      | 0.11      | cysM               |
| 6.77      | -         | 0.26      | nmpC'              |
| 6.77      | 0.23      | 0.29      | argB               |
| 6.56      | 0.23      | 0.21      | uraA               |
| 6.48      | 0.29      | 0.25      | asnA               |
| 5.94      | 0.19      | 0.14      | fliY               |
| 5.50      | 0.13      | 0.21      | nadB               |
| 5.46      | 0.36      | -         | amtF               |
| 5.40      | 0.22      | 0.19      | cysU               |
| 5.38      | 0.15      | 0.14      | IG_127588_127911-r |

|      |      |      |                      |
|------|------|------|----------------------|
| 5.19 | 0.14 | 0.20 | gltB                 |
| 5.09 | 0.34 | 0.30 | argG                 |
| 5.07 | 0.15 | 0.13 | cbl                  |
| 5.00 | 0.25 | 0.19 | IG_2539274_2539698-r |
| 4.77 | 0.45 | 0.47 | argE                 |
| 4.75 | 0.10 | 0.10 | yciW                 |
| 4.20 | 0.17 | 0.13 | ndh                  |
| 4.14 | 0.15 | 0.22 | pyrB                 |
| 3.97 | 0.14 | 0.17 | gatA                 |
| 3.96 | 0.14 | 0.21 | pyrI                 |
| 3.80 | 0.20 | 0.17 | ymgG                 |
| 3.79 | 0.11 | 0.26 | pnuC                 |
| 3.70 | 0.15 | 0.18 | codB                 |
| 3.64 | 0.19 | 0.23 | gatZ                 |
| 3.62 | -    | 0.30 | tyrP                 |
| 3.61 | -    | 0.38 | pheA                 |
| 3.58 | 0.17 | 0.19 | IG_356679_357014-r   |
| 3.49 | 0.36 | -    | rbsB                 |
| 3.47 | 0.27 | 0.31 | gatY                 |
| 3.39 | 0.20 | -    | entB                 |
| 3.38 | 0.20 | 0.27 | gatD                 |
| 3.32 | 0.25 | 0.31 | artJ                 |
| 3.25 | 0.26 | 0.22 | aceE                 |
| 3.25 | 0.33 | -    | fhuA                 |
| 3.22 | 0.32 | -    | glnG                 |
| 3.21 | 0.21 | -    | fiu                  |
| 3.17 | 0.34 | -    | pyrD                 |
| 3.16 | 0.22 | 0.36 | gltD                 |
| 3.12 | 0.39 | -    | glnP                 |
| 3.11 | 0.37 | 0.35 | cysK                 |
| 3.05 | 0.28 | 0.25 | oppC                 |
| 3.01 | 0.31 | 0.26 | pdhR                 |
| 2.99 | 0.18 | 0.20 | codA                 |
| 2.85 | 0.26 | 0.21 | ygbE                 |
| 2.84 | 0.27 | 0.33 | carB                 |
| 2.76 | 0.39 | -    | yagl                 |
| 2.75 | 0.27 | 0.19 | lysA                 |
| 2.69 | 0.15 | 0.13 | yddB                 |
| 2.64 | 0.17 | 0.24 | hisA                 |
| 2.63 | 0.20 | -    | entC                 |
| 2.61 | 0.19 | 0.16 | nlpA                 |
| 2.58 | 0.30 | 0.36 | carA                 |
| 2.57 | 0.29 | 0.19 | yfiD                 |
| 2.55 | -    | 0.41 | yqgB                 |
| 2.53 | 0.34 | 0.30 | ymgD                 |

H. activated in ppGpp<sup>0</sup> *dksA*-, but GreA and/or GreB prevents that

| pv/ d- pv | d-pv/d-pA | d-pv/d-pB |                      |
|-----------|-----------|-----------|----------------------|
| 0.07      | -         | 3.23      | leuL                 |
| 0.09      | 6.83      | 10.04     | IG_77300_77620-f     |
| 0.10      | 25.05     | 19.12     | ibpB                 |
| 0.10      | 10.94     | 7.28      | IG_2241673_2241929-r |
| 0.16      | 4.36      | -         | IG_1294422_1294668-r |
| 0.18      | -         | 3.76      | hisL                 |
| 0.19      | 3.63      | 3.42      | ycdS                 |
| 0.19      | 8.10      | 2.94      | IG_1293368_1293648-r |
| 0.20      | 2.76      | -         | ycdR                 |
| 0.20      | 2.64      | 3.37      | leuC                 |
| 0.20      | -         | 2.88      | IG_1695077_1695296-r |
| 0.22      | 2.95      | 2.47      | yfaZ                 |
| 0.22      | 3.60      | -         | ilvC                 |
| 0.22      | 3.13      | -         | mmuP                 |
| 0.23      | 8.63      | 5.54      | ibpA                 |
| 0.25      | 4.29      | 2.69      | ldrD                 |
| 0.25      | -         | 3.00      | leuD                 |
| 0.25      | 3.15      | 2.87      | yaaX                 |
| 0.26      | 2.77      | -         | rhuA                 |
| 0.27      | 3.58      | 3.29      | IG_2702084_2702354-r |
| 0.27      | 3.27      | 2.86      | yaaH                 |
| 0.27      | 4.52      | 4.13      | bamE                 |
| 0.28      | 2.86      | 3.11      | ybdL                 |
| 0.28      | 2.33      | 2.02      | mmuM                 |
| 0.28      | 2.96      | -         | IG_2428784_2429041-r |
| 0.28      | 3.03      | -         | IG_3697829_3698191-f |
| 0.29      | 3.44      | 4.71      | IG_3483456_3483756-f |
| 0.29      | 3.04      | 2.84      | rdlB                 |
| 0.29      | 3.38      | -         | IG_3119296_3119649-f |
| 0.29      | 2.58      | -         | rapA                 |
| 0.29      | -         | 2.52      | leuA                 |
| 0.29      | 3.47      | -         | IG_3407589_3407916-f |
| 0.30      | -         | 2.65      | osmC                 |
| 0.30      | 2.79      | -         | IG_578860_579102-f   |
| 0.31      | 2.94      | -         | IG_2547427_2547665-r |
| 0.31      | 6.83      | 7.36      | IG_3717398_3717677-f |
| 0.31      | 3.99      | 4.38      | hslO                 |
| 0.32      | 3.26      | 3.32      | rdlC                 |
| 0.32      | 4.06      | 3.42      | rfaE                 |
| 0.32      | 2.53      | -         | yehH                 |
| 0.34      | 3.51      | -         | fadL                 |
| 0.34      | 3.24      | -         | ymfQ                 |
| 0.34      | -         | 3.10      | marB                 |
| 0.34      | 5.71      | 3.34      | ybeD                 |
| 0.34      | -         | 2.82      | slyX                 |
| 0.36      | 3.04      | -         | IG_3267244_3267856-f |
| 0.36      | -         | 2.78      | uspA                 |
| 0.36      | 4.13      | 3.76      | yjcB                 |

|      |      |      |                      |
|------|------|------|----------------------|
| 0.37 | 2.94 | 2.61 | metL                 |
| 0.37 | 2.82 | -    | IG_1223131_1223501-r |
| 0.38 | 4.47 | 3.00 | yhiQ                 |
| 0.38 | -    | 3.62 | IG_2302414_2303127-f |
| 0.38 | 2.51 | -    | ydiV                 |
| 0.40 | 4.30 | -    | yebN                 |
| 0.40 | 0.60 | 2.07 | aceA                 |
| 0.40 | 3.68 | 3.29 | IG_376536_376758-r   |
| 0.40 | 2.79 | -    | prmA                 |

**I. GreB inhibits in ppGpp<sup>0</sup> *dksA*+**

**pv/pB**

|      |                      |
|------|----------------------|
| 5.00 | amtB                 |
| 4.82 | glnK                 |
| 3.95 | nac                  |
| 3.59 | ddpX                 |
| 3.16 | ydcZ                 |
| 3.13 | ilvG                 |
| 3.09 | astC                 |
| 2.53 | IG_1308294_1308592-f |
| 2.51 | IG_925667_925950-f   |

**J. GreB activates in ppGpp<sup>0</sup> *dksA*+**

**pv/pB**

|      |      |
|------|------|
| 0.39 | yddB |
| 0.37 | yjiX |
| 0.34 | aroA |
| 0.26 | yjiY |

### K. GreA inhibits in ppGpp<sup>0</sup> *dksA*<sup>+</sup>

| <b>pv/pA</b> |                      | <b>pv/pA</b> |                      | <b>pv/pA</b> |                      |
|--------------|----------------------|--------------|----------------------|--------------|----------------------|
| 7.63         | pdhR                 | 3.26         | cysM                 | 2.80         | cysJ                 |
| 5.70         | yfiD                 | 3.25         | IG_1360493_1360766-f | 2.76         | IG_3717398_3717677-f |
| 5.11         | sbp                  | 3.11         | IG_1689385_1689609-f | 2.74         | ycfJ                 |
| 4.88         | IG_127588_127911-r   | 3.09         | trpE                 | 2.73         | yeeE                 |
| 4.42         | gspC                 | 3.08         | trpB                 | 2.72         | IG_3326342_3326603-r |
| 4.39         | yjaY                 | 3.00         | IG_262171_262551-f   | 2.71         | argH                 |
| 4.29         | aceE                 | 2.94         | IG_2539274_2539698-r | 2.69         | IG_3198607_3198847-f |
| 4.10         | aldH                 | 2.93         | ecnA                 | 2.67         | cysH                 |
| 3.91         | ndh                  | 2.92         | speA                 | 2.65         | tpr                  |
| 3.81         | yqgB                 | 2.92         | argI                 | 2.65         | ygiA                 |
| 3.75         | argA                 | 2.89         | cysD                 | 2.64         | lysC                 |
| 3.71         | fliY                 | 2.88         | IG_406395_406651-f   | 2.64         | cysI                 |
| 3.59         | asnA                 | 2.87         | trpC                 | 2.63         | ygeQ"                |
| 3.56         | iraD                 | 2.87         | cysP                 | 2.62         | aroM                 |
| 3.43         | purP                 | 2.86         | ibpB                 | 2.60         | IG_2310770_2311103-r |
| 3.42         | fepC                 | 2.83         | speB                 | 2.59         | argC                 |
| 3.40         | IG_2302414_2303127-r | 2.83         | ilvG_2               | 2.56         | sibC                 |
| 3.31         | rnk                  | 2.83         | ilvG_1               | 2.56         | IG_3662249_3662493-r |
| 3.30         | cysU                 | 2.82         | fepD                 | 2.55         | IG_1150628_1150837-r |
| 3.28         | IG_192581_192871-r   | 2.81         | mgtA                 | 2.53         | trpD                 |

### L. GreA activates in ppGpp<sup>0</sup> *dksA*<sup>+</sup>

| <b>pv/pA</b> |      | <b>pv/pA</b> |      | <b>pv/pA</b> |      |
|--------------|------|--------------|------|--------------|------|
| 0.12         | ynfM | 0.33         | aceB | 0.38         | aldA |
| 0.17         | flgE | 0.33         | yegD | 0.38         | dadA |
| 0.18         | flgC | 0.34         | metA | 0.39         | fruA |
| 0.22         | poxA | 0.34         | fimA | 0.39         | rpsV |
| 0.22         | mmuP | 0.34         | fruB | 0.39         | nfrA |
| 0.23         | ycaC | 0.34         | pheP | 0.39         | gcvP |
| 0.30         | aceK | 0.35         | mdtJ | 0.39         | dkgA |
| 0.30         | yehH | 0.35         | gntT | 0.39         | talA |
| 0.30         | nfrB | 0.35         | yjeA | 0.39         | ybdL |
| 0.31         | aceA | 0.35         | mmuM | 0.39         | blc  |
| 0.31         | ilvC | 0.36         | dadX | 0.39         | yiaG |
| 0.32         | katE | 0.36         | otsB | 0.40         | aroD |
| 0.32         | ydhO | 0.36         | fimC | 0.40         | rstB |
| 0.32         | ybgS | 0.37         | fbaB | 0.40         | serA |
| 0.33         | otsA | 0.37         | yjiX | 0.40         | ycaK |
